# Supplementary material
Source: HighWire-hosted journal article supplement (https://oem.bmj.com/content/73/6/368)

## Supplemental material

**eTable 1. Categories of exposure indexes for all substances of interest.**

| Substance                                 | Intensity of Exposure                                                                   | Probability of Exposure                              | Frequency of Exposure                        |
|-------------------------------------------|-----------------------------------------------------------------------------------------|------------------------------------------------------|----------------------------------------------|
| <b>Chlorinated solvents</b>               | TCE                                                                                     |                                                      |                                              |
|                                           | PCE                                                                                     | <5 ppm; 5 - 25 ppm; 26 - 50 ppm; 51 - 100 ppm        |                                              |
|                                           | DMC                                                                                     | <1%; 1 - 10%; 11 - 20%; 21 - 30%, ..., up to 91-100% | <1%; 1 - 10%; ..., up to 91-100%             |
|                                           | CT                                                                                      |                                                      |                                              |
|                                           | CF                                                                                      | not exposed; very low; low; medium; strong           |                                              |
| <b>Fuels and Petroleum-based solvents</b> | BZ                                                                                      | 0.1 - 1 ppm; 1 - 5 ppm; 5 - 15 ppm; >15 ppm          |                                              |
|                                           | WS                                                                                      |                                                      |                                              |
|                                           | KDF                                                                                     | <1 ppm; 1 - 20 ppm; 20 - 50 ppm; >50 ppm             | <1%; 1 - 10%; 11 - 50%; 51 - 90%; 91 - 100%  |
|                                           | SBPs                                                                                    |                                                      | <0.5%; 0.5 - 5%; 5 - 30%; 30 - 70% ; 70-100% |
|                                           | GL                                                                                      | not exposed; low; medium; strong                     |                                              |
| <b>Oxygenated solvents</b>                | Alc                                                                                     |                                                      |                                              |
|                                           | KetEst                                                                                  | not exposed; very low; low; medium; strong           |                                              |
|                                           | Et <sub>2</sub> O                                                                       | <1%; 1 - 10%; 11 - 20%; 21 - 30%, ..., up to 91-100% | <1%; 1 - 10%; 11 - 20%; ..., up to 91-100%   |
|                                           | Glycol                                                                                  |                                                      |                                              |
|                                           | THF                                                                                     | not exposed; low; medium; strong                     | 100%                                         |
| <b>Asbestos<sup>a</sup></b>               | <0.0001 f/ml; 0.0001 - 0.01 f/ml; 0.01 - 0.1 f/ml; 0.1 - 1 f/ml; 1 - 10 f/ml; > 10 f/ml | 1 - 5%; 6 - 30%; 31 - 70%, > 70%                     | <5%; 5 - 30%; 30 - 70%; > 70%                |

Abbreviations: TCE, trichloroethylene; PCE, perchloroethylene; DMC, methylene chloride; CT, carbon tetrachloride; CF, chloroform; BZ, benzene; WS, white spirits; KDF, kerosene/diesel oil/fuels oil; SBPs, special-boiling-point spirits and other aliphatic petroleum-based solvents; GL, gasoline; Alc, alcohol; KetEst, ketones/esters; Et<sub>2</sub>O, diethyl ether; Glycol, ethylene glycol; THF, tetrahydrofuran.

a. The exposure due to working environment and to specific job tasks were defined in same classes, either for intensity and frequency of exposure.

**eTable 2. Mean and standard deviation of smoking history dimensions by categories of CSI, Men, France, 2001-2007.**

| Classes of CSI <sup>a</sup> | Cases       | Controls    | OR    | (95%CI)        | Intensity (cig/day) | Duration (years)   | TSC (years)        | Pack-Years         | CSI <sup>c</sup> |
|-----------------------------|-------------|-------------|-------|----------------|---------------------|--------------------|--------------------|--------------------|------------------|
| Never smokers               | 59          | 813         | 1.00  | -              | 0.0 (0.0)           | 0.0 (0.0)          | 0.0 (0.0)          | 0.0 (0.0)          | 0.0 (0.0)        |
| Light                       | 197         | 844         | 3.15  | 2.31 to 4.28   | 12.2 (10.4)         | 14 (8.7)           | 26.1 (11.0)        | 8.2 (7.7)          | 0.4 (0.2)        |
| Medium-light                | 440         | 594         | 10.33 | 7.71 to 13.85  | 17.0 (9.0)          | 28.3 (8.1)         | 10.7 (8.6)         | 22.6 (12.3)        | 1.1 (0.2)        |
| Medium-strong               | 677         | 354         | 28.30 | 21.02 to 38.10 | 19.8 (7.9)          | 35.8 (7.0)         | 2.9 (4.2)          | 34.2 (12.4)        | 1.7 (0.1)        |
| Strong                      | 868         | 166         | 70.08 | 51.14 to 96.03 | 27.3 (10.5)         | 44 (6.8)           | 0.9 (1.8)          | 58.9 (21.5)        | 2.2 (0.2)        |
| P-value trend               |             |             |       | <0.001         |                     |                    |                    |                    |                  |
| <b>Total<sup>b</sup></b>    | <b>2182</b> | <b>1958</b> |       |                | <b>19.5 (10.8)</b>  | <b>30.8 (13.3)</b> | <b>17.7 (11.7)</b> | <b>32.4 (23.0)</b> | <b>1.8 (0.4)</b> |

Abbreviations: CSI, Comprehensive Smoking Index, CI, confidence interval.

a: CSI in classes according to quartile distribution: Light, CSI ≤ 1<sup>st</sup> quartile; Medium-light, 1<sup>st</sup> quartile < CSI ≤ 2<sup>nd</sup> quartile; Medium-strong, 2<sup>st</sup> quartile < CSI ≤ 3<sup>rd</sup> quartile.

b. Total among ever smokers.

c. Mean value of the CSI as continuous variable and standard deviation.

**eFigure 1. Image plot for Spearman's correlations coefficient among substances' CEI, Men, France, 2001-2007.**

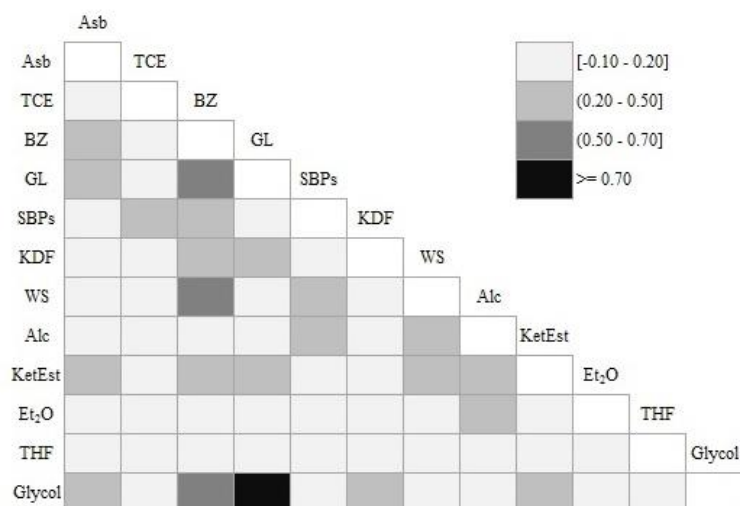

Abbreviations: Asb, asbestos; TCE, trichloroethylene; BZ, benzene; GL, gasoline; SBPs, special-boiling-point spirits and other aliphatic petroleum-based solvents; KDF, kerosene/diesel oil/fuel oils; WS, white spirits; Alc, alcohol; KetEst, ketones/esters; Et<sub>2</sub>O, diethyl ether; THF, tetrahydrofuran; Glycol, ethylene glycol.

**eFigure 2. Distribution of the three most common occupations for clusters with significantly highest log odds ratios of lung cancer, according to International Standard Classification of Occupation (ISCO), Men, France, 2001-2007.**

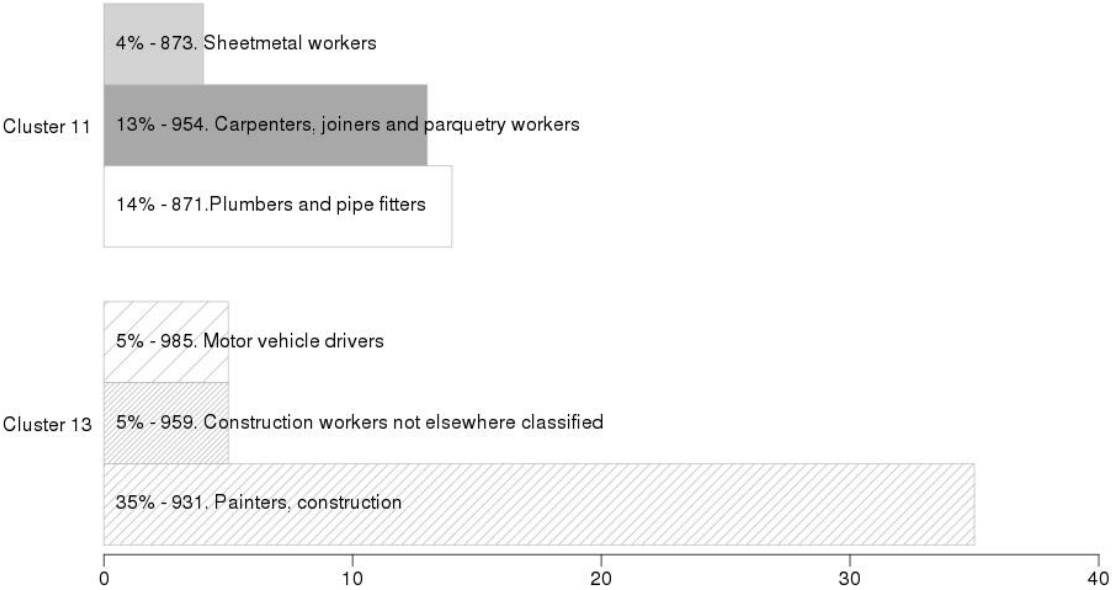

Supplement: inline-supplementary-material-1 [file inline-supplementary-material-1.pdf]
